# Supplementary material for: Mucins as multifunctional building blocks of biomaterials
Source: Royal Society of Chemistry journal article supplement (doi:10.1039/c8bm00471d), 2018-01-01
Supplement: c8bm00471d1.xlsx [file c8bm00471d1.xlsx]

## Sheet: Sheet1
Year	Journal	Property	Title
1930	Exp. Biol. Med.,	barrier	Treatment of Peptic Ulcer with Gastric Mucin
1936	J. Infect. Dis.	barrier	Mucin as an Aid in the Experimental Production of Lobar Pneumonia
1942	Acta Pathol. Microbiol. Scand.,	barrier	The influence of"Mucin 1701 W" on infection with Shope fibroma and vaccinia viruses
1948	Bacteriol. Rev.	barrier	Mucin as a resistance-lowering substance
1951	J. Infect. Dis.	barrier	The use of gastric mucin to lower resistance of laboratory animals to systemic fungus infections
1964	J. Gen. Microbiol.	barrier	The Effect of Mucin on the Survival of Lactobacilli and Streptococci
1974	Infect. Immun.	barrier	Binding of cholera toxin to mucins and inhibition by gastric mucin
1976	Gan	barrier	Protective effect of mucin on experimental gastric cancer induced by N-methyl-N'-nitro-N-nitrosoguanidine plus sodium chloride in rats
1999	Eur. J. Biochem.	barrier	Functional protective role for mucin glycosylated repetitive domains
2000	Colloids Surf. B Biointerfaces,	barrier	Mucin coating on polymeric material surfaces to suppress bacterial adhesion
2004	Comp. Biochem. Physiol. B Biochem. Mol. Biol.	barrier	Anti-adhesive glycoproteins in echinoderm mucus secretions
2006	Expert Opin. Drug Discov	barrier	A new generation of carbohydrate-based therapeutics: recombinant mucin-type fusion proteins as versatile inhibitors of protein–carbohydrate interactions
2007	Neonatology	barrier	Antiviral activity of purified human breast milk mucin
2008	J. Mater. Sci. Mater. Med.	barrier	Interactions between human neutrophils and mucin-coated surfaces
2008	US Patent	barrier	Using mucin glycoproteins in combination with therapeutic agents to treat epithelial lesions and disorders of impaired mucin function
2009	J. Biomed. Mater. Res. A,	barrier	Potential use of mucins as biomaterial coatings. II. Mucin coatings affect the conformation and neutrophil-activating properties of adsorbed host proteins--toward a mucosal mimic
2010	Biofouling	barrier	Adhesion of micro-organisms to bovine submaxillary mucin coatings: Effect of coating deposition conditions
2012	Curr. Biol.,	barrier	Mucin Biopolymers Prevent Bacterial Aggregation by Retaining Cells in the Free-Swimming State
2012	Biomacromolecules	barrier	Mucin biopolymers as broad-spectrum antiviral agents
2012	Proc. Natl. Acad. Sci. U. S. A.	barrier	Overexpressing mouse model demonstrates the protective role of Muc5ac in the lungs
2013	Biomacromolecules,	barrier	Cell patterning with mucin biopolymers
2014	Tissue Eng. Part A	barrier	Mucin covalently bonded to microfibers improves the patency of vascular grafts
2014	MBio	barrier	Mucins Suppress Virulence Traits of Candida albicans
2015	Adv. Mater. Interfaces,	barrier	Probing the Role of Mucin-Bound Glycans in Bacterial Repulsion by Mucin Coatings
2015	Appl. Environ. Microbiol.,	barrier	Salivary mucins protect surfaces from colonization by cariogenic bacteria
2015	Sci. Rep.	barrier	Delivery of a mucin domain enriched in cysteine residues strengthens the intestinal mucous barrier
2017	Polym. Test	barrier	In vitro and in vivo evaluation of the antibacterial properties of a nisin-grafted hydrated mucin multilayer film
2017	FEBS J.	barrier	In vitro Generation of Polysialylated Cervical Mucins by Bacterial Polysialyltransferases to Counteract Cytotoxicity of Extracellular Histones
2018	Macromol Biosci	barrier	Macromolecular Coating Enables Tunable Selectivity in a Porous PDMS Matrix
2005	Evid. Based. Complement. Alternat. Med.,	bioactivity	Helix and Drugs: Snails for Western Health Care From Antiquity to the Present
2012	Master Thesis	bioactivity	Antibacterial mucin and BMP-2 coatings for titanium implant surfaces
2013	Afr. J. Biotechnol.,	bioactivity	Preliminary spectroscopic characterization of PEGylated mucin, a novel polymeric drug delivery system
2013	International Journal of Morphology,	bioactivity	Evaluation of Glucosamine and Snail Mucin on the Progression of Experimental Knee Osteoarthritis in Dogs
2016	J. Biomed. Mater. Res. B Appl. Biomater.,	bioactivity	Evaluation of egg white ovomucin-based porous scaffold as an implantable biomaterial for tissue engineering
2016	US Patent	bioactivity	Isolated mucins and different microorganisms, and methods of use
2018	Mater. Plast.	bioactivity	Bicomponent Hydrogels Based on Methacryloyl Derivatives of Gelatin and Mucin with Potential Wound Dressing Applications
2002	US Patent	chemistry	Mucin comprising vehicle for the transport of biologically-active agents
2004	Angew. Chem. Int. Ed Engl.	chemistry	Biomimetic engineering of carbon nanotubes by using cell surface mucin mimics
2005	Food Hydrocoll.,	chemistry	Emulsion flocculation induced by saliva and mucin
2009	J. Am. Chem. Soc.,	chemistry	Organic reactions promoted by mucin glycoproteins
2010	Small	chemistry	Mucin complexes of nanomaterials: first biochemical encounter
2010	Trends Food Sci. Technol.	chemistry	Ovomucin – a glycoprotein with promising potential
2011	Chem. Res. Toxicol.	chemistry	Enhanced bioavailability of polyaromatic hydrocarbons in the form of mucin complexes
2011	Adv. Mater.	chemistry	Efficient Separation of Dyes by Mucin: Toward Bioinspired White-Luminescent Devices
2011	Chem. Commun.	chemistry	Bio-inspired synthesis of chiral silver nanoparticles in mucin glycoprotein—the natural choice
2012	Biomacromolecules	chemistry	Mucin multilayers assembled through sugar-lectin interactions
2014	Biomacromolecules	chemistry	Sugar-mediated disassembly of mucin/lectin multilayers and their use as pH-Tolerant, on-demand sacrificial layers
2014	US Patent	chemistry	Therapeutic use of mucin glycans
2015	Acta Biomater.	chemistry	Covalently-crosslinked mucin biopolymer hydrogels for sustained drug delivery
2016	Macromol. Biosci.,	chemistry	A Selective Mucin/Methylcellulose Hybrid Gel with Tailored Mechanical Properties
2016	J. Nanopart. Res.,	chemistry	Nanomaterial–protein interactions: the case of pristine and functionalized carbon nanotubes and porcine gastric mucin
2016	PLoS One,	chemistry	Gelation of Soy Milk with Hagfish Exudate Creates a Flocculated and Fibrous Emulsion- and Particle Gel
2018	J. Mater. Chem. B Mater. Biol. Med.,	chemistry	Generation of mucin gel particles with self-degradable and -releasable properties
2015	Sci Rep	chemistry	Accumulation of nanoparticles in “jellyfish” mucus: a bio-inspired route to decontamination of nano-waste
1983	Int. J. Oral Surg.	lubrication/hydration	A clinical comparison between commercially available mucin- and CMC-containing saliva substitutes
1984	US Patent	lubrication/hydration	Sterilized preserved, stable mucine-containing solutions
1986	Int. J. Oral Maxillofac. Surg.,	lubrication/hydration	A double-blind crossover trial of CMC- and mucin-containing saliva substitutes
1989	Br. Dent. J.	lubrication/hydration	A double-blind cross-over trial of a mucin-containing artificial saliva
1992	Scand. J. Caring Sci.	lubrication/hydration	The condition of the oral mucosa in institutionalized elderly patients before and after using a mucin-containing saliva substitute
1993	Oral Surg. Oral Med. Oral Pathol.,	lubrication/hydration	Mucin-containing lozenges in the treatment of intraoral problems associated with Sjögren's syndrome
1994	Journal of Society of Cosmetic Chemists of Japan	lubrication/hydration	The Application of Bovine Submaxillary Gland Mucin (BSM) to Skin Care Cosmetics
1997	Palliat. Med.,	lubrication/hydration	Clinical trial of a mucin-containing oral spray for treatment of xerostomia in hospice patients
2001	US Patent	lubrication/hydration	Mucin containing ophthalmic preparations
2009	J. Dermatolog. Treat.,	lubrication/hydration	The efficacy of Helix aspersa Müller extract in the healing of partial thickness burns: a novel treatment for open burn management protocol
2009	BMC Biotechnol	lubrication/hydration	Jellyfish mucin may have potential disease-modifying effects on osteoarthritis
2009	J. Orthop. Res.	lubrication/hydration	Boundary mode lubrication of articular cartilage by recombinant human lubricin
2009	Arthritis Rheum.	lubrication/hydration	Prevention of cartilage degeneration in a rat model of osteoarthritis by intraarticular treatment with recombinant lubricin
2010	US Patent	lubrication/hydration	Mucin-type glycoprotein and use thereof
2011	Mol. Biol. Rep.	lubrication/hydration	Lubricin: a novel potential biotherapeutic approaches for the treatment of osteoarthritis
2013	Proc. Natl. Acad. Sci. U. S. A.	lubrication/hydration	Role of lubricin and boundary lubrication in the prevention of chondrocyte apoptosis
2014	Adv. Skin Wound Care,	lubrication/hydration	Healing process in mice model of surgical wounds enhanced by Phyllocaulis boraceiensis mucus
2015	Adv. Mater. Interfaces	lubrication/hydration	Modulating Mucin Hydration and Lubrication by Deglycosylation and Polyethylene Glycol Binding
2017	Advanced Materials Interfaces, 2017 cited by 1	lubrication/hydration	Mucin Coatings Prevent Tissue Damage at the Cornea--Contact Lens Interface
